# Supplementary material for: Network‐Informed Gene Ranking Tackles Genetic Heterogeneity in Exome‐Sequencing Studies of Monogenic Disease
Source: PubMed Central journal article supplement (PMC4982032; doi:10.1002/humu.22906), 2015-10-07
Supplement: HUMU-36-1135-s001.pdf [file HUMU-36-1135-s001.pdf]

**Supporting Information for the article:****Network-informed gene ranking tackles genetic heterogeneity  
in exome-sequencing studies of monogenic disease**

Nick Dand, Reiner Schulz, Michael E. Weale, Laura Southgate, Rebecca J. Oakey, Michael A. Simpson and Thomas Schlitt

**Supplementary Methods*****Degree constrained network-permutation approach***

We hypothesised that the number of OMIM disease subnetworks identified in the PINA and PINAmin2 networks was not a simple consequence of the number of disease genes in each network. To test this we checked for disease subnetworks in 10,000 random permutations of each network.

However, if disease genes are more highly connected than average in the network (for example, due to being relatively well-studied) this could bias the test, with disease genes more likely to be connected in the real network than the permuted network if node degree is not accounted for. Therefore we generated permuted networks using a degree-constrained node-shuffling approach, which has been previously described [Lehne, 2012] and applied [Prescott, et al., 2015].

Briefly, node labels are preferentially swapped with nodes of similar degree. For node (i.e. gene)  $g$  this is achieved by listing all other network nodes in increasing order of degree difference relative to  $g$  (with nodes of equal degree ordered uniformly randomly); a one-tailed normal distribution centred at the top of this list is then used to select a node and labels are swapped. This is repeated for all network nodes. The default standard deviation of 5.0 nodes was used.

***Identification of optimal parameters for intersection filtering***

By seeking the filtering thresholds which give the best possible performance for the intersection filtering method, we will obtain a fair assessment of the extent to which HetRank can improve on this method. We therefore tested a range of intersection filtering criteria to identify the optimal combination of parameters.

Testing was performed using 1,000 simulated exome sequencing studies, as described in the main text. Genetic heterogeneity was modelled by disease networks of three genes, with each gene equally likely to be disease-causing ( $p_1 = p_2 = p_3$ ). Heterogeneity not captured by the disease subnetwork was set at 50% ( $u = 0.5$ ). Disease networks generated using both PINA and PINAmin2 networks were tested. Each study comprised 20 simulated case exomes, including spiked disease mutations, and 180 exomes acting as healthy controls.

Filtering criteria tested were:

- variant effect
  - include truncating variants only, or
  - include truncating and protein-altering variants
- 1000 Genomes and EVS alternative allele frequency
  - include novel variants only (both frequencies = 0), or
  - include novel and rare variants (both frequencies  $\leq 0.001$ )
- presence of similar variants in control exomes
  - do not filter genes relative to controls, or
  - exclude genes in which 5+ of control exomes carry variant(s) with consistent mode of inheritance after filtering on frequency and variant effect, or
  - exclude genes in which 10+ of control exomes carry such variants.

Results of these tests are presented in Supp. Table S2. For each mode (autosomal dominant, autosomal recessive and neutral), the best results are in the cells highlighted in green.

Based on their ability to rank the highest number of spiked disease genes in the top ten, the two best-performing combinations of filters are for novel altering variants when genes observed in ten or more controls are excluded and for rare altering variants when genes observed in five or more controls are excluded. However, the latter combination was preferred because it consistently ranked more spiked disease genes in the top three and because it was never substantially outperformed by the former when assessing the genes ranked in the top ten. Therefore all intersection filtering results presented in the main text are based on **rare altering variants with genes observed in five or more controls being excluded**.

### ***Identification of optimal parameters for BioGranat-IG***

As with the intersection filtering method, we aim to identify the BioGranat-IG parameters which give the best possible performance in order to make a fair comparison against HetRank.

Testing was performed on the same set of simulated data as described in the previous section (that is, based on disease subnetworks of three genes with balanced captured heterogeneity and 50% uncaptured heterogeneity). Since BioGranat-IG requires filtered gene lists, we used the optimal filtering procedure determined in the previous section (we filter out synonymous variants, variants with frequency  $> 0.001$  and genes with post-filtering variants in five or more control exomes).

The input network for BioGranat-IG was PINAmin2 or was derived from PINAmin2 (see below), and we tested both high-coverage disease subnetworks (drawn from PINAmin2) and low-coverage disease subnetworks (drawn from PINA; interactions used to model genetic heterogeneity may not be present in PINAmin2).

Parameters tested were:

- BioGranat-IG search algorithm [see Dand, et al., 2013]
  - using triplet search (with default settings: results flexibility parameters = 0), or
  - using minimum and multi-minimum distance heuristic search (with default settings: results flexibility parameters = 0, searches limited to ten genes, 1,000 iterations per gene and 2,000,000 iterations total)
- treatment of input network hub genes (hub genes tend to be over-represented in BioGranat-IG results and it is advisable to use an input network with highly-connected hub genes removed)
  - use full PINAmin2 network, or
  - use PINAmin2\_d50, a network constructed by removing nodes of degree 50 or more from PINAmin2.

Results of these tests are presented in Supp. Table S3. For each mode (autosomal dominant, autosomal recessive and neutral), the best results are in the cells highlighted in green. Note that BioGranat-IG's exact triplet search was unable to produce results for comparison in the full PINAmin2 network due to the network's complexity.

The results show that when considering the average number of spiked disease genes that are ranked in the top ten (that is, by being returned in a list of ten genes or fewer), BioGranat-IG is most effective across all scenarios when its **triplet search algorithm is employed in the hub-free version of the network, PINAmin2\_d50**. Therefore all BioGranat-IG results presented in the main text are based on this combination of parameters.

## Supplementary Results

### ***HetRank would better prioritise Adams-Oliver syndrome genes with variants in additional exomes***

HetRank was able to rank *NOTCH1* (novel truncating variants in 2 exomes) in 12<sup>th</sup> position and *DLL4* (novel protein-altering variant in 1 exome) in (joint) 187<sup>th</sup> position when applied to 13 AOS exomes using the PINA network.

We tested whether additional variants in these genes would improve their rankings. To do this we added additional copies of the known causal variants to 1 or more of the 10 AOS exomes not harbouring *NOTCH1* or *DLL4* mutations (for which the genetic cause remains unknown). Results are summarised in Supp. Table S7.

When the causal (protein-altering) *DLL4* variant is added to 2 additional exomes, *DLL4* is ranked seventh by HetRank. Due to its relatively high degree of 65 in the PINA network, *NOTCH1* does not benefit from the increased evidence in its direct neighbour *DLL4*, and it is ranked 13<sup>th</sup> (dropping one place to accommodate *DLL4* ahead of it).

When instead one of the causal (truncating) *NOTCH1* variants is added to 1 additional exome, *NOTCH1* is ranked first by HetRank. *DLL4* has a relatively low degree of 3 in the network and does benefit from evidence in its direct neighbour *NOTCH1*, so that its rank is improved to 47. As causal *NOTCH1* variants are added to further exomes, *NOTCH1* remains the top-ranked gene and *DLL4*'s rank continues to improve. By the time 4 additional exomes have *NOTCH1* variants, the rank of *DLL4* has peaked at 20. This is because all of the genes ranked 2-19 are also direct neighbours of *NOTCH1* in the PINA network so that they will all benefit from each subsequent exome that receives a *NOTCH1* variant.

## Supplementary References

- Dand N, Sprengel F, Ahlers V, Schlitt T. 2013. BioGranat-IG: a network analysis tool to suggest mechanisms of genetic heterogeneity from exome-sequencing data. *Bioinformatics* 29:733-741.
- Lehne B. 2012. Computational Analyses of Complex Diseases at the Gene and Network Levels [Doctoral Thesis]: King's College London, UK.
- Prescott NJ, Lehne B, Stone K, Lee JC, Taylor K, Knight J, Papouli E, Mirza MM, Simpson MA, Spain SL, Lu G, Fraternali F et al. 2015. Pooled sequencing of 531 genes in inflammatory bowel disease identifies an associated rare variant in *BTNL2* and implicates other immune related genes. *PLoS Genet* 11:e1004955.

Figure S1 – Examples of variant score profiles

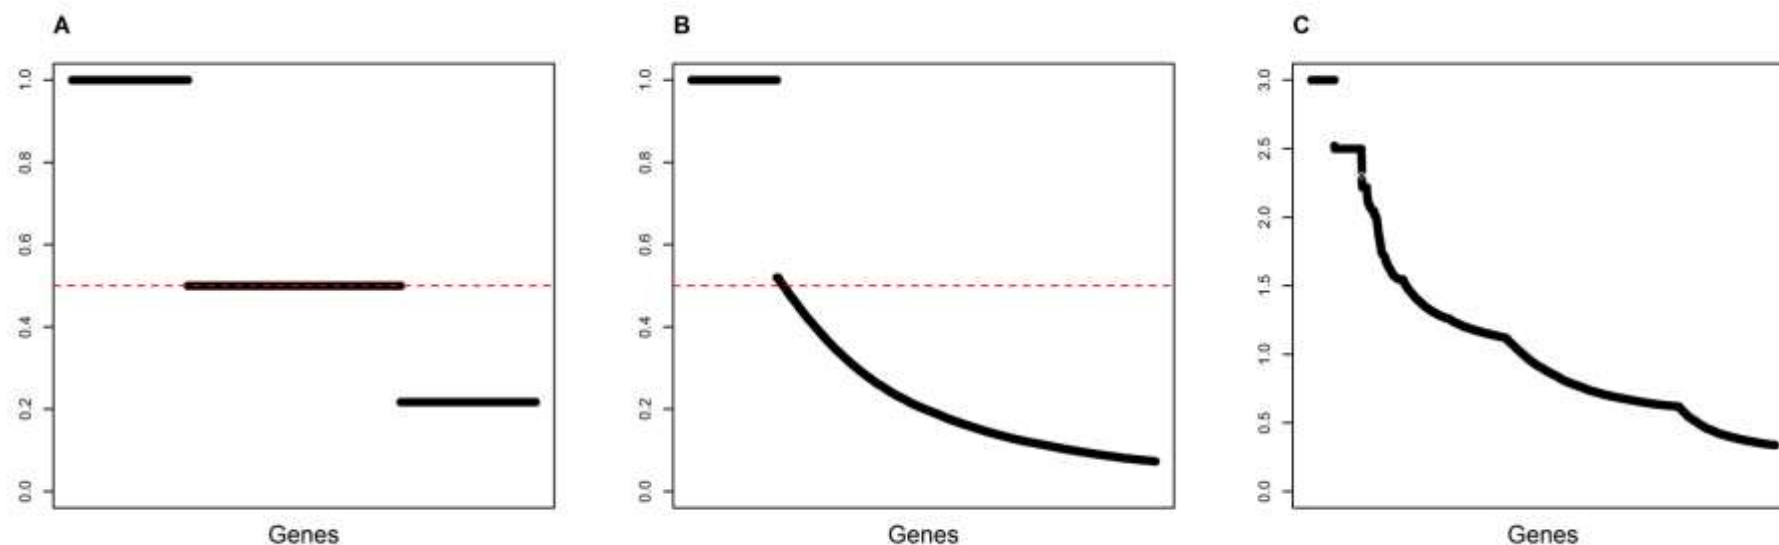

Plots show example gene scores in a single exome based on different variant annotations (with gene scores derived from variant scores in neutral mode). Gene scores are plotted in decreasing order. **(a)** Gene scores based on variant effect only, ranked according to “truncating > altering > synonymous” and with a filter-equivalent threshold value set at “altering”. This results in truncating variants all receiving a score of 1, while altering variants are forced to receive a score of 0.5 (red dotted line). Scaling of variant scores with respect to filter-equivalent threshold values works as follows. Let  $y$  be the reciprocal of the rank assigned to variant  $v$  with respect to the annotation (where average rank is used to resolve ties). Then the scaled variant score  $y^*$  is set equal to  $0.5 + 0.5 \times (y - y_{thresh}) / (y_{max} - y_{thresh})$  if  $y \geq y_{thresh}$  or  $0.5 \times y / y_{thresh}$  if  $y < y_{thresh}$  (where  $y_{thresh}$  is the reciprocal rank of the variant whose annotation value is at or is closest inside the filter-equivalent threshold value, and  $y_{max}$  is the largest reciprocal rank among all variants – which is equal to 1 if there is a unique highest-ranking variant but  $< 1$  if there are multiple joint-top-ranked variants). **(b)** Gene scores based on EVS alternative allele frequency only, ranked in increasing order and with a filter-equivalent threshold value set at 0.001. This results in novel variants all receiving a score of 1; gene scores cross the red dotted line (score of 0.5) at a gene whose rarest variant has frequency closest to 0.001. Gene scores based on 1000 Genomes alternative allele frequency only give a similar plot. **(c)** Gene scores based on all three annotations (variant effect, EVS alternative allele frequency and 1000 Genomes alternative allele frequency) together with order and filter-equivalent threshold values as previously.

Figure S2 – Method for simulation of exome sequencing studies

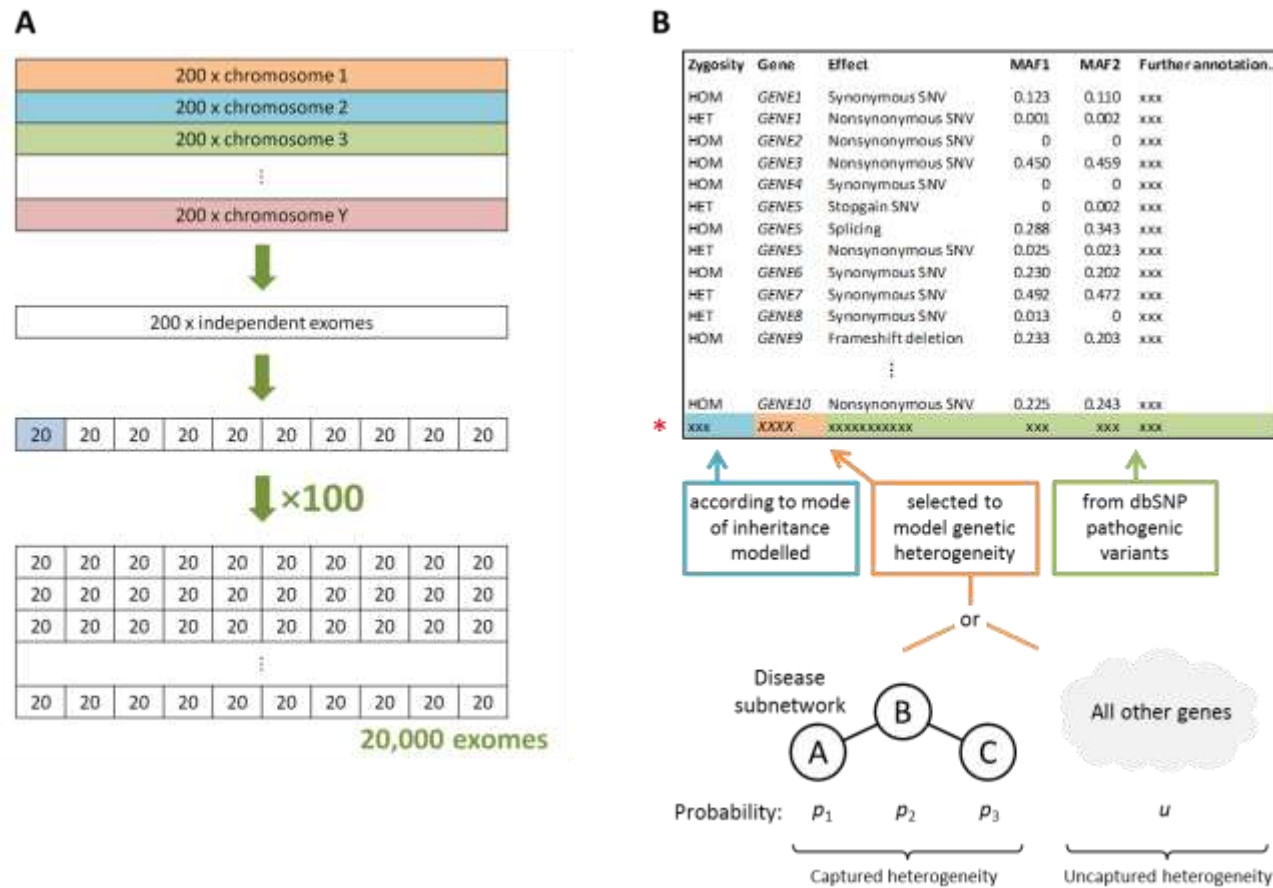

**(a)** Unspiked exomes are generated in blocks of 200 through random selection (without replacement) of variants by chromosome from 388 sequenced exomes. Each block of 200 unspiked exomes can be split into ten “studies” of 20 exomes each. For each study the other 180 exomes in the block share no genetic material and can therefore be used as unaffected control exomes in their unspiked state. **(b)** To simulate rare disease exome sequencing studies, each of the 20 annotated exomes in a study are “spiked” with an additional disease-causing variant (red asterisk), or two variants in the event that a compound heterozygous mutation is modelled. Annotation for the spiked variant(s) are determined as follows: zygoty is chosen to model specific modes of disease inheritance; gene name is randomly selected to model genetic heterogeneity (“captured” heterogeneity from a disease subnetwork with probability  $1-u$  or “uncaptured” with probability  $u$ ); all other annotation is randomly selected from a set of pathogenic variants from dbSNP. When captured heterogeneity is generated from a disease subnetwork of three genes (genes A, B and C here) the probabilities that each gene is picked are denoted  $p_1$ ,  $p_2$  and  $p_3$  (such that  $p_1 + p_2 + p_3 + u = 1$ )

**Figure S3 – Distributions of variant annotations**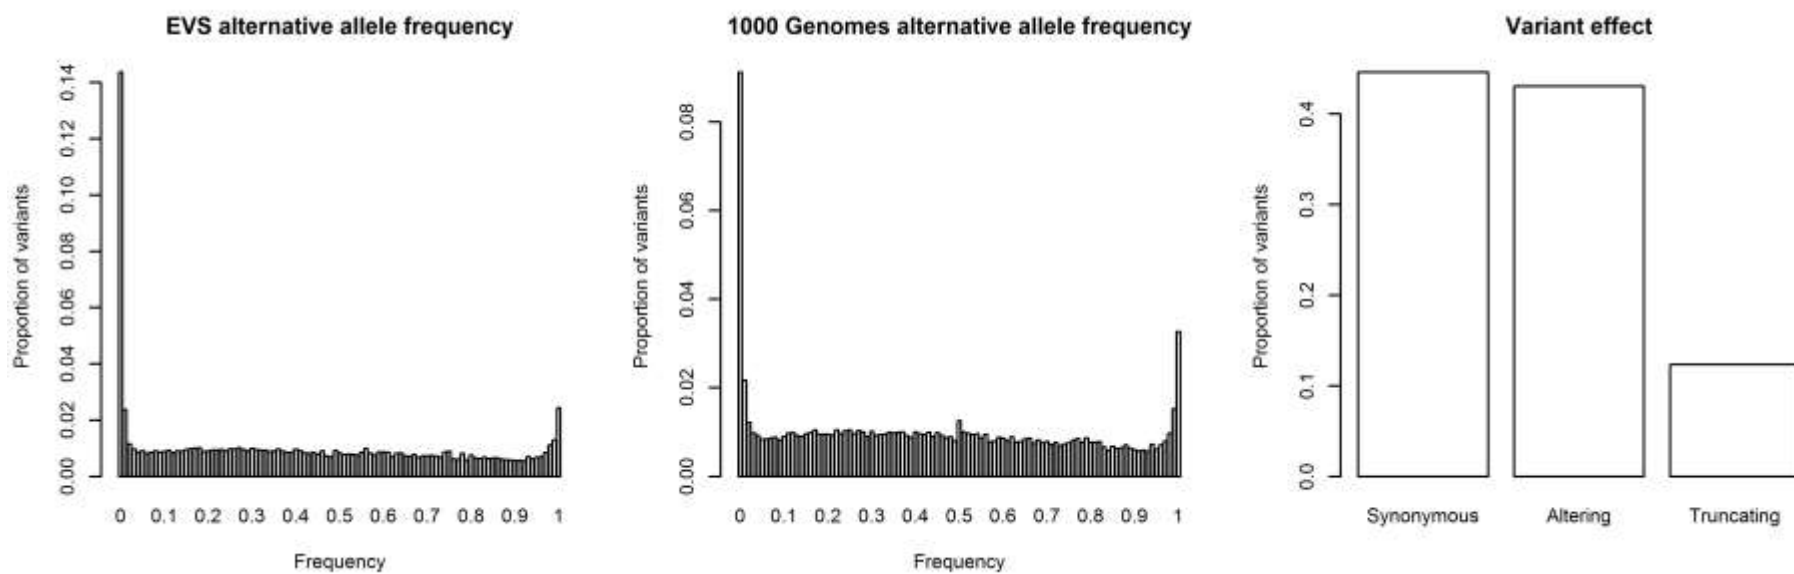

Plots show distributions for the three variant annotations used (EVS alternative allele frequency, 1000 Genomes alternative allele frequency and variant effect) across all 20,000 (unspiked) exomes, generated as described in the main text.

**Figure S4 – Interactions between genes involved in the same disease occur frequently**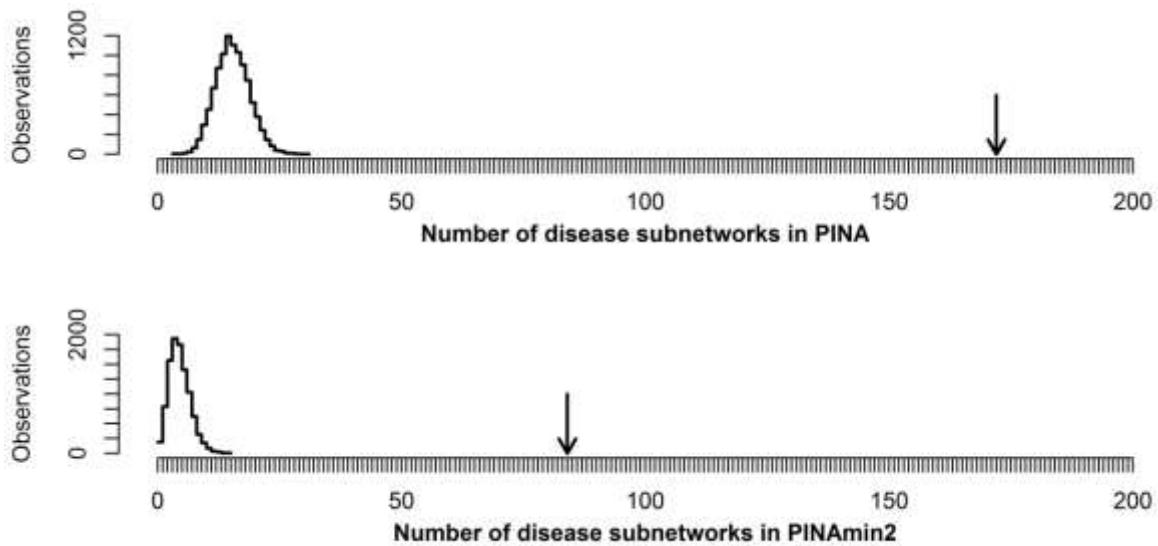

Frequency plots showing the number of disease subnetworks (connected sets of two or more genes causing the same disease) identified in 10,000 random degree-constrained permutations of the PINA and PINAmin2 networks. Arrows indicate number of disease networks found in the original networks.



**Figure S5 – Performance of HetRank in neutral mode at varying levels of genetic heterogeneity**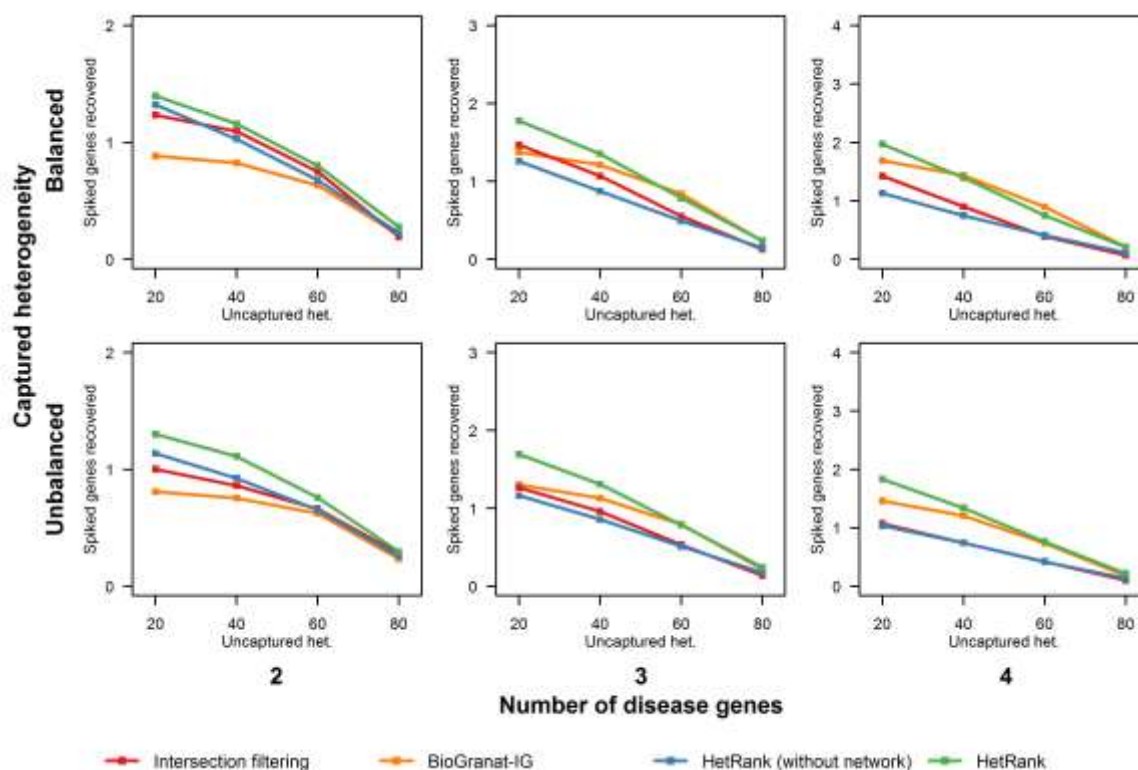

Results for HetRank's neutral mode; corresponding plots for Autosomal Dominant and Autosomal Recessive modes are given in main text (Figure 2). Plots show the average number of spiked disease genes that could be prioritised (assigned a rank of ten or less) across 1,000 simulated exome sequencing studies by the four methods tested (HetRank, HetRank excluding the network-based step, BioGranat-IG and simple intersection filtering). Different genetic heterogeneity scenarios are represented by the columns (number of genes in disease subnetworks modelling genetic heterogeneity), rows (whether this captured heterogeneity is balanced or unbalanced across disease subnetwork genes), and plot x-axes (degree of genetic heterogeneity not captured by disease subnetwork genes). Results are also tabulated in Supp. Table S4.

**Table S1 – OMIM Disease Subnetworks**

| <b>Network</b> | <b>Generalised disease term</b>                        | <b>Causal genes connected in network</b>                                  |
|----------------|--------------------------------------------------------|---------------------------------------------------------------------------|
| PINA           | 3-M syndrome                                           | <i>CUL7, OBSL1</i>                                                        |
| PINAMin2       | 3-M syndrome                                           | <i>CUL7, OBSL1</i>                                                        |
| PINA           | 46XY sex reversal                                      | <i>MAP3K1, SRY</i>                                                        |
| PINA           | Acne inversa familial                                  | <i>PSEN1, NCSTN, PSENEN</i>                                               |
| PINAMin2       | Acne inversa familial                                  | <i>PSEN1, NCSTN, PSENEN</i>                                               |
| PINA           | Afibrinogenemia congenital                             | <i>FGB, FGA</i>                                                           |
| PINAMin2       | Afibrinogenemia congenital                             | <i>FGA, FGB</i>                                                           |
| PINA           | Agammaglobulinemia                                     | <i>CD79A, CD79B, BLNK, IGHM</i>                                           |
| PINAMin2       | Agammaglobulinemia                                     | <i>CD79A, BLNK, CD79B</i>                                                 |
| PINA           | Albinism oculocutaneous type                           | <i>TYR, TYRP1</i>                                                         |
| PINAMin2       | Albinism oculocutaneous type                           | <i>TYR, TYRP1</i>                                                         |
| PINA           | Arrhythmogenic right ventricular dysplasia             | <i>JUP, DSP, DSC2, DSC3, DSG2, PKP2</i>                                   |
| PINAMin2       | Arrhythmogenic right ventricular dysplasia             | <i>JUP, DSP</i>                                                           |
| PINA           | Arthrogryposis renal dysfunction and cholestasis       | <i>VPS33B, VIPAS39</i>                                                    |
| PINAMin2       | Arthrogryposis renal dysfunction and cholestasis       | <i>VPS33B, VIPAS39</i>                                                    |
| PINA           | Atrial fibrillation familial                           | <i>KCNQ1, KCNE2</i>                                                       |
| PINA           | Axenfeld-Rieger syndrome type                          | <i>FOXC1, PITX2</i>                                                       |
| PINA           | Baraitser-Winter syndrome                              | <i>ACTB, ACTG1</i>                                                        |
| PINAMin2       | Baraitser-Winter syndrome                              | <i>ACTB, ACTG1</i>                                                        |
| PINA           | Bardet-Biedl syndrome                                  | <i>ARL6, BBS1, BBS4, BBS12, BBS7, BBS9, BBS10, BBS2, MKKS, BBS5, TTC8</i> |
| PINAMin2       | Bardet-Biedl syndrome                                  | <i>BBS1, BBS4, BBS7, BBS9, BBS12, BBS2, ARL6, MKKS, BBS5, TTC8</i>        |
| PINA           | Bare lymphocyte syndrome type                          | <i>TAP1, TAPBP</i>                                                        |
| PINAMin2       | Bare lymphocyte syndrome type                          | <i>TAPBP, TAP1</i>                                                        |
| PINA           | Bare lymphocyte syndrome type complementation group    | <i>RFX5, RFXAP</i>                                                        |
| PINA           | Basal cell carcinoma somatic                           | <i>PTCH1, SMO, PTCH2</i>                                                  |
| PINA           | Bernard-Soulier syndrome type                          | <i>GP9, GP1BB</i>                                                         |
| PINAMin2       | Bernard-Soulier syndrome type                          | <i>GP1BB, GP9</i>                                                         |
| PINA           | Brachydactyly type                                     | <i>BMPR1B, BMP2, GDF5, NOG</i>                                            |
| PINAMin2       | Brachydactyly type                                     | <i>BMP2, BMPR1B, GDF5, NOG</i>                                            |
| PINA           | Bradyopsia                                             | <i>RGS9, RGS9BP</i>                                                       |
| PINA           | Breast cancer                                          | <i>TP53, ESR1, PPM1D</i>                                                  |
| PINA           | Bronchiectasis with or without elevated sweat chloride | <i>SCNN1B, SCNN1A, SCNN1G</i>                                             |
| PINA           | Brugada syndrome                                       | <i>CACNA1C, CACNB2</i>                                                    |
| PINA           | C1q deficiency                                         | <i>C1QA, C1QB, C1QC</i>                                                   |
| PINAMin2       | C1q deficiency                                         | <i>C1QA, C1QB, C1QC</i>                                                   |
| PINA           | C8 deficiency type                                     | <i>C8A, C8B</i>                                                           |
| PINA           | Cardiofaciocutaneous syndrome                          | <i>BRAF, MAP2K1, MAP2K2</i>                                               |
| PINAMin2       | Cardiofaciocutaneous syndrome                          | <i>BRAF, MAP2K2, MAP2K1</i>                                               |
| PINA           | Cardiomyopathy familial hypertrophic                   | <i>TNNI3, TPM1, TNNT2, TNNC1</i>                                          |

| <b>Network</b> | <b>Generalised disease term</b>                              | <b>Causal genes connected in network</b>                  |
|----------------|--------------------------------------------------------------|-----------------------------------------------------------|
| PINA           | Cardiomyopathy familial hypertrophic                         | <i>MYBPC3, TTN</i>                                        |
| PINamin2       | Cardiomyopathy familial hypertrophic                         | <i>TNNI3, TNNT2, TNNC1</i>                                |
| PINA           | Cataract Coppock-like                                        | <i>CRYBB2, CRYGC</i>                                      |
| PINA           | Cerebrooculofacioskeletal syndrome                           | <i>ERCC2, ERCC6, ERCC5</i>                                |
| PINamin2       | Cerebrooculofacioskeletal syndrome                           | <i>ERCC5, ERCC6</i>                                       |
| PINA           | Charcot-Marie-Tooth disease axonal type                      | <i>HSPB1, HSPB8</i>                                       |
| PINamin2       | Charcot-Marie-Tooth disease axonal type                      | <i>HSPB1, HSPB8</i>                                       |
| PINA           | Charcot-Marie-Tooth disease type                             | <i>NEFL, MTMR2</i>                                        |
| PINA           | Charcot-Marie-Tooth disease type                             | <i>PMP22, MPZ</i>                                         |
| PINA           | Chorioidal dystrophy central areolar                         | <i>PRPH2, PRPH</i>                                        |
| PINA           | Cirrhosis cryptogenic                                        | <i>KRT18, KRT8</i>                                        |
| PINamin2       | Cirrhosis cryptogenic                                        | <i>KRT8, KRT18</i>                                        |
| PINA           | Cockayne syndrome type                                       | <i>ERCC6, ERCC8</i>                                       |
| PINamin2       | Cockayne syndrome type                                       | <i>ERCC8, ERCC6</i>                                       |
| PINA           | Colorectal cancer hereditary nonpolyposis type               | <i>MLH1, MSH2, PMS2, MSH6</i>                             |
| PINamin2       | Colorectal cancer hereditary nonpolyposis type               | <i>MLH1, MSH2, MSH6, PMS2</i>                             |
| PINA           | Colorectal cancer somatic                                    | <i>EP300, APC, CTNNB1, AKT1, BRAF, BUB1B, DLC1, AXIN2</i> |
| PINA           | Colorectal cancer somatic                                    | <i>NRAS, PIK3CA</i>                                       |
| PINamin2       | Colorectal cancer somatic                                    | <i>AKT1, APC, CTNNB1, EP300, AXIN2</i>                    |
| PINA           | Combined cellular and humoral immune defects with granulomas | <i>RAG1, RAG2</i>                                         |
| PINA           | Cone-rod dystrophy                                           | <i>GUCA1A, GUCY2D</i>                                     |
| PINamin2       | Cone-rod dystrophy                                           | <i>GUCA1A, GUCY2D</i>                                     |
| PINA           | Congenital disorder of glycosylation type                    | <i>DPM1, DPM2, DPM3</i>                                   |
| PINA           | Congenital disorder of glycosylation type                    | <i>COG1, COG4, COG7, COG5, COG6</i>                       |
| PINamin2       | Congenital disorder of glycosylation type                    | <i>COG1, COG4, COG7, COG6, COG5</i>                       |
| PINamin2       | Congenital disorder of glycosylation type                    | <i>DPM1, DPM3</i>                                         |
| PINA           | Cornelia de Lange syndrome                                   | <i>RAD21, SMC3, NIPBL</i>                                 |
| PINamin2       | Cornelia de Lange syndrome                                   | <i>RAD21, SMC3</i>                                        |
| PINA           | Cowden syndrome                                              | <i>AKT1, PTEN</i>                                         |
| PINA           | Cutis laxa autosomal recessive type                          | <i>EFEMP2, FBLN5</i>                                      |
| PINA           | Deafness autosomal dominant                                  | <i>SIX1, EYA4</i>                                         |
| PINA           | Deafness autosomal recessive                                 | <i>MYO7A, CDH23, DFNB31, MYO15A</i>                       |
| PINA           | Dejerine-Sottas disease                                      | <i>PMP22, MPZ</i>                                         |
| PINA           | Dementia Lewy body                                           | <i>SNCA, SNCB</i>                                         |
| PINA           | Diabetes mellitus permanent neonatal                         | <i>INS, GCK</i>                                           |
| PINA           | Diabetes mellitus transient neonatal                         | <i>ABCC8, KCNJ11</i>                                      |
| PINA           | Diamond-Blackfan anemia                                      | <i>RPL5, RPL11</i>                                        |
| PINamin2       | Diamond-Blackfan anemia                                      | <i>RPL5, RPL11</i>                                        |
| PINA           | Dysfibrinogenemia type                                       | <i>FGB, FGG</i>                                           |
| PINamin2       | Dysfibrinogenemia type                                       | <i>FGB, FGG</i>                                           |
| PINA           | Ehlers-Danlos syndrome type                                  | <i>COL1A1, COL1A2</i>                                     |
| PINA           | Ehlers-Danlos syndrome type                                  | <i>COL5A2, COL5A1</i>                                     |
| PINamin2       | Ehlers-Danlos syndrome type                                  | <i>COL1A1, COL1A2</i>                                     |

| <b>Network</b> | <b>Generalised disease term</b>                                      | <b>Causal genes connected in network</b>                                                   |
|----------------|----------------------------------------------------------------------|--------------------------------------------------------------------------------------------|
| PINA           | Epidermolysis bullosa simplex type                                   | <i>KRT5, KRT14</i>                                                                         |
| PINamin2       | Epidermolysis bullosa simplex type                                   | <i>KRT14, KRT5</i>                                                                         |
| PINA           | Epidermolysis bullosa junctional type                                | <i>ITGB4, COL17A1</i>                                                                      |
| PINA           | Epidermolysis bullosa junctional type                                | <i>LAMB3, LAMA3, LAMC2</i>                                                                 |
| PINamin2       | Epidermolysis bullosa junctional type                                | <i>LAMB3, LAMA3, LAMC2</i>                                                                 |
| PINA           | Epilepsy nocturnal frontal lobe                                      | <i>CHRNA2, CHRNA4</i>                                                                      |
| PINamin2       | Epilepsy nocturnal frontal lobe                                      | <i>CHRNA2, CHRNA4</i>                                                                      |
| PINA           | Epilepsy progressive myoclonic 2B (Lafora)                           | <i>EPM2A, NHLRC1</i>                                                                       |
| PINamin2       | Epilepsy progressive myoclonic 2B (Lafora)                           | <i>EPM2A, NHLRC1</i>                                                                       |
| PINA           | Epiphyseal dysplasia multiple                                        | <i>COL9A1, COMP, MATN3</i>                                                                 |
| PINA           | Episodic ataxia type                                                 | <i>CACNA1A, CACNB4</i>                                                                     |
| PINA           | Erythrocytosis familial                                              | <i>VHL, EPAS1, EGLN1</i>                                                                   |
| PINamin2       | Erythrocytosis familial                                              | <i>VHL, EPAS1, EGLN1</i>                                                                   |
| PINA           | Exostoses multiple type                                              | <i>EXT1, EXT2</i>                                                                          |
| PINA           | Fanconi anemia complementation group                                 | <i>FANCA, FANCG, FANCM, BRCA2, PALB2, FANCC, FANCB, FANCI, FANCD2, FANCE, FANCF, BRIP1</i> |
| PINamin2       | Fanconi anemia complementation group                                 | <i>FANCG, BRCA2, FANCA, FANCM, FANCC, FANCD2, FANCE, PALB2, FANCF, FANCB, FANCI</i>        |
| PINA           | Foveomacular dystrophy adult-onset with choroidal neovascularization | <i>PRPH2, PRPH</i>                                                                         |
| PINA           | Frontonasal dysplasia                                                | <i>ALX1, ALX4</i>                                                                          |
| PINA           | Glanzmann thrombasthenia                                             | <i>ITGB3, ITGA2B</i>                                                                       |
| PINamin2       | Glanzmann thrombasthenia                                             | <i>ITGA2B, ITGB3</i>                                                                       |
| PINA           | Griscelli syndrome type                                              | <i>RAB27A, MLPH, MYO5A</i>                                                                 |
| PINamin2       | Griscelli syndrome type                                              | <i>MLPH, RAB27A, MYO5A</i>                                                                 |
| PINA           | Hemangioma capillary infantile somatic                               | <i>KDR, FLT4</i>                                                                           |
| PINamin2       | Hemangioma capillary infantile somatic                               | <i>KDR, FLT4</i>                                                                           |
| PINA           | Hemochromatosis type                                                 | <i>HAMP, SLC40A1</i>                                                                       |
| PINA           | Hemophagocytic lymphohistiocytosis familial                          | <i>STX11, FHL5</i>                                                                         |
| PINA           | Hepatocellular carcinoma somatic                                     | <i>CTNNB1, AXIN1, CASP8</i>                                                                |
| PINamin2       | Hepatocellular carcinoma somatic                                     | <i>AXIN1, CTNNB1</i>                                                                       |
| PINA           | Hermansky-Pudlak syndrome                                            | <i>DTNBP1, BLOC1S3</i>                                                                     |
| PINA           | Hermansky-Pudlak syndrome                                            | <i>HPS1, HPS4</i>                                                                          |
| PINA           | Hermansky-Pudlak syndrome                                            | <i>HPS6, HPS5</i>                                                                          |
| PINamin2       | Hermansky-Pudlak syndrome                                            | <i>BLOC1S3, DTNBP1</i>                                                                     |
| PINamin2       | Hermansky-Pudlak syndrome                                            | <i>HPS6, HPS5</i>                                                                          |
| PINA           | Hyperinsulinemic hypoglycemia familial                               | <i>ABCC8, KCNJ11</i>                                                                       |
| PINA           | Hypogonadotropic hypogonadism with or without anosmia                | <i>FGFR1, FGF8</i>                                                                         |
| PINA           | Hypogonadotropic hypogonadism with or without anosmia                | <i>GNRH1, GNRHR</i>                                                                        |
| PINA           | Hypogonadotropic hypogonadism with or without anosmia                | <i>TACR3, TAC3</i>                                                                         |
| PINA           | Hypogonadotropic hypogonadism with or without anosmia                | <i>KISS1, KISS1R</i>                                                                       |

| <b>Network</b> | <b>Generalised disease term</b>                                         | <b>Causal genes connected in network</b>                                                     |
|----------------|-------------------------------------------------------------------------|----------------------------------------------------------------------------------------------|
| PINA           | Immune dysfunction with T-cell inactivation due to calcium entry defect | <i>ORAI1, STIM1</i>                                                                          |
| PINamin2       | Immune dysfunction with T-cell inactivation due to calcium entry defect | <i>ORAI1, STIM1</i>                                                                          |
| PINA           | Immunodeficiency common variable                                        | <i>CD19, CR2, CD81</i>                                                                       |
| PINamin2       | Immunodeficiency common variable                                        | <i>CD19, CR2, CD81</i>                                                                       |
| PINA           | Iridogoniodysgenesis type                                               | <i>FOXC1, PITX2</i>                                                                          |
| PINA           | Kabuki syndrome                                                         | <i>KDM6A, MLL2</i>                                                                           |
| PINamin2       | Kabuki syndrome                                                         | <i>KDM6A, MLL2</i>                                                                           |
| PINA           | LADD syndrome                                                           | <i>FGFR2, FGF10</i>                                                                          |
| PINamin2       | LADD syndrome                                                           | <i>FGF10, FGFR2</i>                                                                          |
| PINA           | LEOPARD syndrome                                                        | <i>RAF1, BRAF</i>                                                                            |
| PINamin2       | LEOPARD syndrome                                                        | <i>RAF1, BRAF</i>                                                                            |
| PINA           | Leigh syndrome due to mitochondrial complex I deficiency                | <i>NDUFS3, NDUF9</i>                                                                         |
| PINamin2       | Leigh syndrome due to mitochondrial complex I deficiency                | <i>NDUFS3, NDUF9</i>                                                                         |
| PINA           | Leukemia acute myeloid                                                  | <i>CEBPA, RUNX1</i>                                                                          |
| PINA           | Leukemia acute promyelocytic type                                       | <i>ZBTB16, PML</i>                                                                           |
| PINA           | Leukoencephalopathy with vanishing white matter                         | <i>EIF2B1, EIF2B2, EIF2B5, EIF2B3</i>                                                        |
| PINamin2       | Leukoencephalopathy with vanishing white matter                         | <i>EIF2B5, EIF2B1</i>                                                                        |
| PINA           | Li-Fraumeni syndrome                                                    | <i>CHEK2, TP53</i>                                                                           |
| PINamin2       | Li-Fraumeni syndrome                                                    | <i>TP53, CHEK2</i>                                                                           |
| PINA           | Liddle syndrome                                                         | <i>SCNN1B, SCNN1G</i>                                                                        |
| PINA           | Lissencephaly                                                           | <i>TUBA1A, PAFAH1B1</i>                                                                      |
| PINA           | Loeys-Dietz syndrome type                                               | <i>SMAD3, TGFBR1, TGFBR2, TGFB2</i>                                                          |
| PINamin2       | Loeys-Dietz syndrome type                                               | <i>TGFBR1, SMAD3, TGFBR2, TGFB2</i>                                                          |
| PINA           | MODY type                                                               | <i>HNF4A, HNF1A</i>                                                                          |
| PINA           | Macular dystrophy                                                       | <i>PRPH2, PRPH</i>                                                                           |
| PINA           | Macular dystrophy patterned                                             | <i>PRPH2, PRPH</i>                                                                           |
| PINA           | Macular dystrophy vitelliform                                           | <i>PRPH2, PRPH</i>                                                                           |
| PINA           | Maple syrup urine disease type                                          | <i>BCKDHA, BCKDHB</i>                                                                        |
| PINamin2       | Maple syrup urine disease type                                          | <i>BCKDHA, BCKDHB</i>                                                                        |
| PINA           | Meckel syndrome                                                         | <i>TMEM67, MKS1</i>                                                                          |
| PINA           | Meier-Gorlin syndrome                                                   | <i>CDC6, CDT1, ORC4, ORC1, ORC6</i>                                                          |
| PINamin2       | Meier-Gorlin syndrome                                                   | <i>CDC6, ORC1, ORC4, CDT1, ORC6</i>                                                          |
| PINA           | Mental retardation X-linked                                             | <i>GDI1, FTSJ1</i>                                                                           |
| PINA           | Mental retardation autosomal dominant                                   | <i>SMARCA4, ARID1A, CTNNB1, GRIN1, GRIN2B, ARID1B, SMARCB1, CDH15, SYNGAP1, CDH3, CACNG2</i> |
| PINamin2       | Mental retardation autosomal dominant                                   | <i>SMARCA4, ARID1A, SMARCB1, ARID1B</i>                                                      |
| PINamin2       | Mental retardation autosomal dominant                                   | <i>CTNNB1, CDH3</i>                                                                          |
| PINamin2       | Mental retardation autosomal dominant                                   | <i>GRIN2B, GRIN1</i>                                                                         |

| <b>Network</b> | <b>Generalised disease term</b>                                                      | <b>Causal genes connected in network</b>                            |
|----------------|--------------------------------------------------------------------------------------|---------------------------------------------------------------------|
| PINA           | Methemoglobinemia type                                                               | <i>CYB5A, CYB5R3</i>                                                |
| PINA           | Microcephaly primary autosomal recessive                                             | <i>CEP135, CENPJ</i>                                                |
| PINA           | Mismatch repair cancer syndrome                                                      | <i>MLH1, MSH2, PMS2, MSH6</i>                                       |
| PINAMin2       | Mismatch repair cancer syndrome                                                      | <i>MLH1, MSH2, MSH6, PMS2</i>                                       |
| PINA           | Mitochondrial complex I deficiency                                                   | <i>NDUFS3, NDUFS2</i>                                               |
| PINAMin2       | Mitochondrial complex I deficiency                                                   | <i>NDUFS3, NDUFS2</i>                                               |
| PINA           | Muir-Torre syndrome                                                                  | <i>MLH1, MSH2</i>                                                   |
| PINAMin2       | Muir-Torre syndrome                                                                  | <i>MLH1, MSH2</i>                                                   |
| PINA           | Multiple pterygium syndrome type                                                     | <i>CHRND, CHRNA1, CHRNG</i>                                         |
| PINAMin2       | Multiple pterygium syndrome type                                                     | <i>CHRNA1, CHRND</i>                                                |
| PINA           | Muscular dystrophy limb-girdle type                                                  | <i>DYSF, TCAP, DNAJB6, CAPN3, TTN, CAV3, SGCG, SGCA, SGCB, SGCD</i> |
| PINAMin2       | Muscular dystrophy limb-girdle type                                                  | <i>TCAP, CAPN3, TTN</i>                                             |
| PINAMin2       | Muscular dystrophy limb-girdle type                                                  | <i>SGCG, SGCB, SGCA, SGCD</i>                                       |
| PINA           | Muscular dystrophy-dystroglycanopathy (congenital with brain and eye anomalies) type | <i>POMT2, POMT1</i>                                                 |
| PINA           | Muscular dystrophy-dystroglycanopathy (congenital with mental retardation) type      | <i>POMT2, POMT1</i>                                                 |
| PINA           | Muscular dystrophy-dystroglycanopathy (limb-girdle) type                             | <i>POMT2, POMT1</i>                                                 |
| PINA           | Myasthenic syndrome congenital associated with acetylcholine receptor deficiency     | <i>CHRNA1, MUSK, RAPSN</i>                                          |
| PINA           | Myasthenic syndrome fast-channel congenital                                          | <i>CHRND, CHRNA1, CHRNE</i>                                         |
| PINAMin2       | Myasthenic syndrome fast-channel congenital                                          | <i>CHRNA1, CHRND</i>                                                |
| PINA           | Myasthenic syndrome slow-channel congenital                                          | <i>CHRND, CHRNA1, CHRNE</i>                                         |
| PINAMin2       | Myasthenic syndrome slow-channel congenital                                          | <i>CHRNA1, CHRND</i>                                                |
| PINA           | Mycobacterial infection atypical familial disseminated                               | <i>STAT1, IFNGR1</i>                                                |
| PINAMin2       | Mycobacterial infection atypical familial disseminated                               | <i>STAT1, IFNGR1</i>                                                |
| PINA           | Myopathy congenital with fiber-type                                                  | <i>ACTA1, TPM3</i>                                                  |
| PINA           | Nasu-Hakola disease                                                                  | <i>TYROBP, TREM2</i>                                                |
| PINA           | Nephrolithiasis/osteoporosis hypophosphatemic                                        | <i>SLC9A3R1, SLC34A1</i>                                            |
| PINA           | Nephrotic syndrome type                                                              | <i>NPHS1, NPHS2</i>                                                 |
| PINA           | Neuropathy distal hereditary motor type                                              | <i>HSPB1, HSPB8</i>                                                 |
| PINAMin2       | Neuropathy distal hereditary motor type                                              | <i>HSPB1, HSPB8</i>                                                 |
| PINA           | Neuropathy hereditary sensory and autonomic type                                     | <i>SPTLC1, SPTLC2</i>                                               |
| PINA           | Noonan syndrome                                                                      | <i>SOS1, PTPN11</i>                                                 |
| PINA           | Noonan syndrome                                                                      | <i>NRAS, KRAS, RAF1, BRAF</i>                                       |
| PINAMin2       | Noonan syndrome                                                                      | <i>SOS1, PTPN11</i>                                                 |
| PINAMin2       | Noonan syndrome                                                                      | <i>RAF1, BRAF, KRAS, NRAS</i>                                       |
| PINA           | Omenn syndrome                                                                       | <i>RAG1, RAG2</i>                                                   |
| PINA           | Orofacial cleft                                                                      | <i>SUMO1, MSX1, TP63</i>                                            |
| PINA           | Osteogenesis imperfecta type                                                         | <i>COL1A1, BMP1, COL1A2</i>                                         |
| PINAMin2       | Osteogenesis imperfecta type                                                         | <i>COL1A1, COL1A2</i>                                               |
| PINA           | Osteopetrosis autosomal recessive                                                    | <i>TNFSF11, TNFRSF11A</i>                                           |

| <b>Network</b> | <b>Generalised disease term</b>                                                      | <b>Causal genes connected in network</b> |
|----------------|--------------------------------------------------------------------------------------|------------------------------------------|
| PINA           | Osteopetrosis autosomal recessive                                                    | <i>CLCN7, OSTM1</i>                      |
| PINA           | Osteosarcoma somatic                                                                 | <i>CHEK2, RB1</i>                        |
| PINA           | Ovarian cancer somatic                                                               | <i>ERBB2, CTNNB1</i>                     |
| PINA           | Ovarioleukodystrophy                                                                 | <i>EIF2B2, EIF2B5, EIF2B4</i>            |
| PINA           | Pachyonychia congenita type                                                          | <i>KRT17, KRT6A</i>                      |
| PINA           | Pancreatic cancer                                                                    | <i>TP53, BRCA2</i>                       |
| PINamin2       | Pancreatic cancer                                                                    | <i>TP53, BRCA2</i>                       |
| PINA           | Paragangliomas                                                                       | <i>SDHA, SDHB</i>                        |
| PINamin2       | Paragangliomas                                                                       | <i>SDHB, SDHA</i>                        |
| PINA           | Parkinson disease                                                                    | <i>HTRA2, EIF4G1</i>                     |
| PINA           | Parkinson disease                                                                    | <i>SNCA, LRRK2</i>                       |
| PINA           | Persistent Mullerian duct syndrome type                                              | <i>AMH, AMHR2</i>                        |
| PINA           | Pick disease                                                                         | <i>MAPT, PSEN1</i>                       |
| PINA           | Pituitary hormone deficiency combined                                                | <i>PROP1, HESX1</i>                      |
| PINA           | Pontocerebellar hypoplasia type                                                      | <i>TSEN2, TSEN54, TSEN34</i>             |
| PINA           | Porencephaly                                                                         | <i>COL4A1, COL4A2</i>                    |
| PINamin2       | Porencephaly                                                                         | <i>COL4A1, COL4A2</i>                    |
| PINA           | Propionicacidemia                                                                    | <i>PCCB, PCCA</i>                        |
| PINA           | Pseudohypoaldosteronism type                                                         | <i>SCNN1B, SCNN1A, SCNN1G</i>            |
| PINA           | Renal tubular dysgenesis                                                             | <i>AGT, AGTR1</i>                        |
| PINA           | Retinitis pigmentosa                                                                 | <i>ABCA4, CNGB1, PRPH2, PRPH</i>         |
| PINA           | Retinitis pigmentosa digenic                                                         | <i>PRPH2, PRPH, ROM1</i>                 |
| PINA           | Retinitis punctata albescens                                                         | <i>PRPH2, PRPH</i>                       |
| PINA           | Roussy-Levy syndrome                                                                 | <i>PMP22, MPZ</i>                        |
| PINA           | Severe combined immunodeficiency B cell-negative                                     | <i>RAG1, RAG2</i>                        |
| PINA           | Severe combined immunodeficiency T cell-negative B-cell/natural killer-cell positive | <i>CD3D, CD3E</i>                        |
| PINamin2       | Severe combined immunodeficiency T cell-negative B-cell/natural killer-cell positive | <i>CD3D, CD3E</i>                        |
| PINA           | Sitosterolemia                                                                       | <i>ABCG8, ABCG5</i>                      |
| PINamin2       | Sitosterolemia                                                                       | <i>ABCG8, ABCG5</i>                      |
| PINA           | Spastic paraplegia autosomal recessive                                               | <i>AP4E1, AP4M1, AP4S1, AP4B1</i>        |
| PINamin2       | Spastic paraplegia autosomal recessive                                               | <i>AP4E1, AP4B1</i>                      |
| PINA           | Spherocytosis type                                                                   | <i>SPTA1, SPTB</i>                       |
| PINA           | Spherocytosis type                                                                   | <i>SLC4A1, ANK1</i>                      |
| PINamin2       | Spherocytosis type                                                                   | <i>SPTA1, SPTB</i>                       |
| PINA           | Spinocerebellar ataxia                                                               | <i>ATXN1, ATXN2</i>                      |
| PINA           | Stickler syndrome type                                                               | <i>COL2A1, COL9A2</i>                    |
| PINA           | Surfactant metabolism dysfunction pulmonary                                          | <i>CSF2RB, CSF2RA</i>                    |
| PINamin2       | Surfactant metabolism dysfunction pulmonary                                          | <i>CSF2RA, CSF2RB</i>                    |
| PINA           | Telangiectasia hereditary hemorrhagic type                                           | <i>ENG, ACVRL1</i>                       |
| PINA           | Thrombocythemia                                                                      | <i>JAK2, MPL, THPO</i>                   |
| PINamin2       | Thrombocythemia                                                                      | <i>THPO, MPL</i>                         |
| PINA           | Thrombophilia dysfibrinogenemic                                                      | <i>FGB, FGG</i>                          |
| PINamin2       | Thrombophilia dysfibrinogenemic                                                      | <i>FGB, FGG</i>                          |
| PINA           | Thyroid carcinoma papillary                                                          | <i>TRIM24, TRIM33</i>                    |
| PINA           | Treacher Collins syndrome                                                            | <i>POLR1C, POLR1D</i>                    |
| PINamin2       | Treacher Collins syndrome                                                            | <i>POLR1C, POLR1D</i>                    |

| <b>Network</b> | <b>Generalised disease term</b> | <b>Causal genes connected in network</b>    |
|----------------|---------------------------------|---------------------------------------------|
| PINA           | Trichothiodystrophy             | <i>ERCC2, ERCC3</i>                         |
| PINAMin2       | Trichothiodystrophy             | <i>ERCC3, ERCC2</i>                         |
| PINA           | UV-sensitive syndrome           | <i>ERCC6, ERCC8</i>                         |
| PINAMin2       | UV-sensitive syndrome           | <i>ERCC8, ERCC6</i>                         |
| PINA           | Usher syndrome type             | <i>MYO7A, CDH23, DFNB31, USH1C, USH1G</i>   |
| PINAMin2       | Usher syndrome type             | <i>CDH23, USH1C</i>                         |
| PINA           | Ventricular septal defect       | <i>GATA4, NKX2-5</i>                        |
| PINAMin2       | Ventricular septal defect       | <i>GATA4, NKX2-5</i>                        |
| PINA           | Waardenburg syndrome type       | <i>EDNRB, EDN3</i>                          |
| PINA           | Waardenburg syndrome type       | <i>SOX10, PAX3, MITF</i>                    |
| PINAMin2       | Waardenburg syndrome type       | <i>PAX3, SOX10</i>                          |
| PINA           | Warburg micro syndrome          | <i>RAB3GAP2, RAB3GAP1</i>                   |
| PINA           | Xeroderma pigmentosum group     | <i>ERCC2, ERCC3, XPA, XPC, ERCC5, ERCC4</i> |
| PINAMin2       | Xeroderma pigmentosum group     | <i>ERCC3, ERCC2, ERCC5</i>                  |

List of all disease subnetworks identified in the PINA and PINAMin2 networks. Note that generalised disease terms have had disease “type” or “group” designations removed.



**Table S2 – Performance of intersection filtering method using various parameters****(a) Performance based on disease subnetworks from PINAmin2**

| Autosomal Dominant Mode                                   |          |          |              |        |         |          |          |              |          |        |         |          |
|-----------------------------------------------------------|----------|----------|--------------|--------|---------|----------|----------|--------------|----------|--------|---------|----------|
| Variant effect filter                                     | Novel    | Novel    | Novel        | Novel  | Novel   | Novel    | Rare     | Rare         | Rare     | Rare   | Rare    | Rare     |
| Frequency filter                                          | Altering | Altering | Altering     | Trunc. | Trunc.  | Trunc.   | Altering | Altering     | Altering | Trunc. | Trunc.  | Trunc.   |
| Control exomes filter                                     | None     | 5 ctrls  | 10 ctrls     | None   | 5 ctrls | 10 ctrls | None     | 5 ctrls      | 10 ctrls | None   | 5 ctrls | 10 ctrls |
| Average # genes per exome with variant(s) after filtering | 759.9    | 114.0    | 161.8        | 328.9  | 40.1    | 52.6     | 844.3    | 137.4        | 212.7    | 340.9  | 49.6    | 63.3     |
| Disease gene ranked #1                                    | 0        | 309      | 177          | 0      | 20      | 4        | 0        | 293          | 188      | 0      | 21      | 4        |
| Disease gene ranked #1-2                                  | 0        | 42       | 16           | 0      | 0       | 0        | 0        | 42           | 18       | 0      | 0       | 0        |
| Disease gene ranked #1-3                                  | 0        | 4        | 1            | 0      | 0       | 0        | 0        | 3            | 1        | 0      | 0       | 0        |
| Average # disease genes ranked in top ten                 | 0.002    | 0.757    | <b>0.776</b> | 0.040  | 0.174   | 0.055    | 0.002    | 0.762        | 0.657    | 0.040  | 0.207   | 0.061    |
| Autosomal Recessive Mode                                  |          |          |              |        |         |          |          |              |          |        |         |          |
| Variant effect filter                                     | Novel    | Novel    | Novel        | Novel  | Novel   | Novel    | Rare     | Rare         | Rare     | Rare   | Rare    | Rare     |
| Frequency filter                                          | Altering | Altering | Altering     | Trunc. | Trunc.  | Trunc.   | Altering | Altering     | Altering | Trunc. | Trunc.  | Trunc.   |
| Control exomes filter                                     | None     | 5 ctrls  | 10 ctrls     | None   | 5 ctrls | 10 ctrls | None     | 5 ctrls      | 10 ctrls | None   | 5 ctrls | 10 ctrls |
| Average # genes per exome with variant(s) after filtering | 485.0    | 19.7     | 31.3         | 218.2  | 8.4     | 15.1     | 493.3    | 23.8         | 35.9     | 218.9  | 8.8     | 15.6     |
| Disease gene ranked #1                                    | 0        | 387      | 181          | 0      | 8       | 2        | 0        | 500          | 255      | 0      | 8       | 2        |
| Disease gene ranked #1-2                                  | 0        | 68       | 12           | 0      | 0       | 0        | 0        | 124          | 26       | 0      | 0       | 0        |
| Disease gene ranked #1-3                                  | 0        | 9        | 3            | 0      | 0       | 0        | 0        | 10           | 3        | 0      | 0       | 0        |
| Average # disease genes ranked in top ten                 | 0.000    | 1.198    | 0.733        | 0.000  | 0.136   | 0.034    | 0.000    | <b>1.491</b> | 0.969    | 0.000  | 0.136   | 0.041    |
| NeutralMode                                               |          |          |              |        |         |          |          |              |          |        |         |          |
| Variant effect filter                                     | Novel    | Novel    | Novel        | Novel  | Novel   | Novel    | Rare     | Rare         | Rare     | Rare   | Rare    | Rare     |
| Frequency filter                                          | Altering | Altering | Altering     | Trunc. | Trunc.  | Trunc.   | Altering | Altering     | Altering | Trunc. | Trunc.  | Trunc.   |
| Control exomes filter                                     | None     | 5 ctrls  | 10 ctrls     | None   | 5 ctrls | 10 ctrls | None     | 5 ctrls      | 10 ctrls | None   | 5 ctrls | 10 ctrls |
| Average # genes per exome with variant(s) after filtering | 1107.1   | 113.7    | 161.0        | 522.3  | 40.5    | 53.0     | 1190.8   | 136.6        | 211.5    | 534.5  | 50.1    | 63.6     |
| Disease gene ranked #1                                    | 0        | 339      | 211          | 0      | 25      | 5        | 0        | 342          | 221      | 0      | 29      | 6        |

|                                           |       |       |              |       |       |       |       |       |       |       |       |       |
|-------------------------------------------|-------|-------|--------------|-------|-------|-------|-------|-------|-------|-------|-------|-------|
| Disease gene ranked #1-2                  | 0     | 49    | 21           | 0     | 0     | 0     | 0     | 54    | 29    | 0     | 0     | 0     |
| Disease gene ranked #1-3                  | 0     | 2     | 2            | 0     | 0     | 0     | 0     | 5     | 1     | 0     | 0     | 0     |
| Average # disease genes ranked in top ten | 0.000 | 0.830 | <b>0.860</b> | 0.000 | 0.191 | 0.069 | 0.000 | 0.806 | 0.744 | 0.000 | 0.231 | 0.071 |

**(b) Performance based on disease subnetworks from PINA**

| Autosomal Dominant Mode                                   |          |          |          |        |         |          |          |              |          |        |         |          |
|-----------------------------------------------------------|----------|----------|----------|--------|---------|----------|----------|--------------|----------|--------|---------|----------|
| Variant effect filter                                     | Novel    | Novel    | Novel    | Novel  | Novel   | Novel    | Rare     | Rare         | Rare     | Rare   | Rare    | Rare     |
| Frequency filter                                          | Altering | Altering | Altering | Trunc. | Trunc.  | Trunc.   | Altering | Altering     | Altering | Trunc. | Trunc.  | Trunc.   |
| Control exomes filter                                     | None     | 5 ctrls  | 10 ctrls | None   | 5 ctrls | 10 ctrls | None     | 5 ctrls      | 10 ctrls | None   | 5 ctrls | 10 ctrls |
| Average # genes per exome with variant(s) after filtering | 759.9    | 114.0    | 161.8    | 328.9  | 40.1    | 52.6     | 844.3    | 137.4        | 212.7    | 340.9  | 49.6    | 63.3     |
| Disease gene ranked #1                                    | 0        | 284      | 163      | 0      | 20      | 5        | 0        | 299          | 199      | 0      | 25      | 5        |
| Disease gene ranked #1-2                                  | 0        | 36       | 13       | 0      | 0       | 0        | 0        | 31           | 13       | 0      | 0       | 0        |
| Disease gene ranked #1-3                                  | 0        | 3        | 0        | 0      | 0       | 0        | 0        | 1            | 0        | 0      | 0       | 0        |
| Average # disease genes ranked in top ten                 | 0.002    | 0.727    | 0.744    | 0.021  | 0.193   | 0.053    | 0.002    | <b>0.756</b> | 0.647    | 0.021  | 0.234   | 0.058    |
| Autosomal Recessive Mode                                  |          |          |          |        |         |          |          |              |          |        |         |          |
| Variant effect filter                                     | Novel    | Novel    | Novel    | Novel  | Novel   | Novel    | Rare     | Rare         | Rare     | Rare   | Rare    | Rare     |
| Frequency filter                                          | Altering | Altering | Altering | Trunc. | Trunc.  | Trunc.   | Altering | Altering     | Altering | Trunc. | Trunc.  | Trunc.   |
| Control exomes filter                                     | None     | 5 ctrls  | 10 ctrls | None   | 5 ctrls | 10 ctrls | None     | 5 ctrls      | 10 ctrls | None   | 5 ctrls | 10 ctrls |
| Average # genes per exome with variant(s) after filtering | 485.0    | 19.7     | 31.3     | 218.2  | 8.4     | 15.1     | 493.3    | 23.8         | 35.9     | 218.9  | 8.8     | 15.6     |
| Disease gene ranked #1                                    | 0        | 367      | 161      | 0      | 7       | 2        | 0        | 496          | 246      | 0      | 8       | 3        |
| Disease gene ranked #1-2                                  | 0        | 82       | 16       | 0      | 0       | 0        | 0        | 138          | 27       | 0      | 0       | 0        |
| Disease gene ranked #1-3                                  | 0        | 4        | 0        | 0      | 0       | 0        | 0        | 11           | 0        | 0      | 0       | 0        |
| Average # disease genes ranked in top ten                 | 0.000    | 1.227    | 0.739    | 0.000  | 0.153   | 0.047    | 0.000    | <b>1.466</b> | 0.960    | 0.000  | 0.181   | 0.053    |
| NeutralMode                                               |          |          |          |        |         |          |          |              |          |        |         |          |
| Variant effect filter                                     | Novel    | Novel    | Novel    | Novel  | Novel   | Novel    | Rare     | Rare         | Rare     | Rare   | Rare    | Rare     |
| Frequency filter                                          | Altering | Altering | Altering | Trunc. | Trunc.  | Trunc.   | Altering | Altering     | Altering | Trunc. | Trunc.  | Trunc.   |

| Control exomes filter                                     | None   | 5 ctrls | 10 ctrls     | None  | 5 ctrls | 10 ctrls | None   | 5 ctrls | 10 ctrls | None  | 5 ctrls | 10 ctrls |
|-----------------------------------------------------------|--------|---------|--------------|-------|---------|----------|--------|---------|----------|-------|---------|----------|
| Average # genes per exome with variant(s) after filtering | 1107.1 | 113.7   | 161.0        | 522.3 | 40.5    | 53.0     | 1190.8 | 136.6   | 211.6    | 534.5 | 50.1    | 63.7     |
| Disease gene ranked #1                                    | 0      | 308     | 192          | 0     | 24      | 7        | 0      | 329     | 239      | 0     | 29      | 7        |
| Disease gene ranked #1-2                                  | 0      | 51      | 18           | 0     | 0       | 0        | 0      | 37      | 22       | 0     | 0       | 0        |
| Disease gene ranked #1-3                                  | 0      | 5       | 0            | 0     | 0       | 0        | 0      | 1       | 0        | 0     | 0       | 0        |
| Average # disease genes ranked in top ten                 | 0.000  | 0.803   | <b>0.847</b> | 0.000 | 0.216   | 0.074    | 0.000  | 0.816   | 0.747    | 0.000 | 0.260   | 0.075    |

Results are based on 1,000 tests. "Disease gene ranked  $x$ " = number of 1,000 simulations in which a spiked disease gene ranked in all of the top  $x$  positions.

**Table S3 – Performance of BioGranat-IG method using various parameters****(a) Performance based on disease subnetworks from PINAmin2 (high-coverage disease subnetworks)**

| Autosomal Dominant Mode                                          |                |                |                    |                    |
|------------------------------------------------------------------|----------------|----------------|--------------------|--------------------|
| Search algorithm                                                 | Triplet search | Triplet search | Min/multi distance | Min/multi distance |
| Network                                                          | PINAmin2       | PINAmin2_d50   | PINAmin2           | PINAmin2_d50       |
| Average # disease genes returned                                 | N/A            | 1.445          | 0.970              | 0.816              |
| Average # disease genes returned in top ten                      | N/A            | <b>1.385</b>   | 0.387              | 0.444              |
| # scenarios in which all three disease genes returned in top ten | N/A            | 260            | 25                 | 70                 |
| Autosomal Recessive Mode                                         |                |                |                    |                    |
| Search algorithm                                                 | Triplet search | Triplet search | Min/multi distance | Min/multi distance |
| Network                                                          | PINAmin2       | PINAmin2_d50   | PINAmin2           | PINAmin2_d50       |
| Average # disease genes returned                                 | N/A            | 2.413          | 1.976              | 2.134              |
| Average # disease genes returned in top ten                      | N/A            | <b>2.406</b>   | 0.006              | 1.721              |
| # scenarios in which all three disease genes returned in top ten | N/A            | 597            | 2                  | 438                |
| Neutral Mode                                                     |                |                |                    |                    |
| Search algorithm                                                 | Triplet search | Triplet search | Min/multi distance | Min/multi distance |
| Network                                                          | PINAmin2       | PINAmin2_d50   | PINAmin2           | PINAmin2_d50       |
| Average # disease genes returned                                 | N/A            | 1.471          | 1.020              | 0.874              |
| Average # disease genes returned in top ten                      | N/A            | <b>1.409</b>   | 0.400              | 0.475              |
| # scenarios in which all three disease genes returned in top ten | N/A            | 263            | 32                 | 74                 |

**(b) Performance based on disease subnetworks from PINA (low-coverage disease subnetworks)**

| Autosomal Dominant Mode                     |                |                |                    |                    |
|---------------------------------------------|----------------|----------------|--------------------|--------------------|
| Search algorithm                            | Triplet search | Triplet search | Min/multi distance | Min/multi distance |
| Network                                     | PINAmin2       | PINAmin2_d50   | PINAmin2           | PINAmin2_d50       |
| Average # disease genes returned            | N/A            | 1.049          | 0.711              | 0.557              |
| Average # disease genes returned in top ten | N/A            | <b>0.994</b>   | 0.300              | 0.309              |
| # scenarios in which all three              | N/A            | 131            | 10                 | 37                 |

|                                                                  |                       |                       |                           |                           |
|------------------------------------------------------------------|-----------------------|-----------------------|---------------------------|---------------------------|
| disease genes returned in top ten                                |                       |                       |                           |                           |
| <b>Autosomal Recessive Mode</b>                                  |                       |                       |                           |                           |
| <b>Search algorithm</b>                                          | <b>Triplet search</b> | <b>Triplet search</b> | <b>Min/multi distance</b> | <b>Min/multi distance</b> |
| <b>Network</b>                                                   | <b>PINamin2</b>       | <b>PINamin2_d50</b>   | <b>PINamin2</b>           | <b>PINamin2_d50</b>       |
| Average # disease genes returned                                 | N/A                   | 1.701                 | 1.517                     | 1.448                     |
| Average # disease genes returned in top ten                      | N/A                   | <b>1.691</b>          | 0.013                     | 1.178                     |
| # scenarios in which all three disease genes returned in top ten | N/A                   | 260                   | 4                         | 267                       |
| <b>Neutral Mode</b>                                              |                       |                       |                           |                           |
| <b>Search algorithm</b>                                          | <b>Triplet search</b> | <b>Triplet search</b> | <b>Min/multi distance</b> | <b>Min/multi distance</b> |
| <b>Network</b>                                                   | <b>PINamin2</b>       | <b>PINamin2_d50</b>   | <b>PINamin2</b>           | <b>PINamin2_d50</b>       |
| Average # disease genes returned                                 | N/A                   | 1.083                 | 0.767                     | 0.594                     |
| Average # disease genes returned in top ten                      | N/A                   | <b>1.045</b>          | 0.336                     | 0.334                     |
| # scenarios in which all three disease genes returned in top ten | N/A                   | 131                   | 16                        | 43                        |

Results are based on 1,000 tests. N/A indicates results could not be obtained for triplet search algorithm in the full PINamin2 network.

**Table S4 – Ability of all methods to recover disease subnetworks under varying levels of genetic heterogeneity**

|                                          | Average # disease genes ranked in top ten |       |       |       | Average # disease genes ranked in top ten |       |       |       | Average # disease genes ranked in top ten |       |       |       |
|------------------------------------------|-------------------------------------------|-------|-------|-------|-------------------------------------------|-------|-------|-------|-------------------------------------------|-------|-------|-------|
|                                          | Autosomal Dominant Mode                   |       |       |       | Autosomal Recessive Mode                  |       |       |       | Neutral Mode                              |       |       |       |
|                                          | Uncaptured heterogeneity                  |       |       |       | Uncaptured heterogeneity                  |       |       |       | Uncaptured heterogeneity                  |       |       |       |
|                                          | 20%                                       | 40%   | 60%   | 80%   | 20%                                       | 40%   | 60%   | 80%   | 20%                                       | 40%   | 60%   | 80%   |
| <b>Balanced captured Heterogeneity</b>   |                                           |       |       |       |                                           |       |       |       |                                           |       |       |       |
| 2-gene disease subnetworks:              |                                           |       |       |       |                                           |       |       |       |                                           |       |       |       |
| HetRank                                  | 1.362                                     | 1.118 | 0.772 | 0.276 | 1.873                                     | 1.756 | 1.514 | 0.790 | 1.398                                     | 1.159 | 0.801 | 0.277 |
| HetRank (pre-network)                    | 1.299                                     | 0.986 | 0.652 | 0.208 | 1.817                                     | 1.685 | 1.355 | 0.620 | 1.323                                     | 1.029 | 0.677 | 0.226 |
| Intersection filtering                   | 1.236                                     | 1.074 | 0.707 | 0.176 | 1.810                                     | 1.657 | 1.236 | 0.443 | 1.235                                     | 1.096 | 0.750 | 0.193 |
| BioGranat-IG                             | 0.887                                     | 0.815 | 0.622 | 0.190 | 1.270                                     | 1.232 | 1.072 | 0.534 | 0.884                                     | 0.825 | 0.633 | 0.212 |
| 3-gene disease subnetworks:              |                                           |       |       |       |                                           |       |       |       |                                           |       |       |       |
| HetRank                                  | 1.707                                     | 1.288 | 0.740 | 0.220 | 2.659                                     | 2.416 | 1.922 | 0.874 | 1.777                                     | 1.353 | 0.785 | 0.238 |
| HetRank (pre-network)                    | 1.203                                     | 0.825 | 0.453 | 0.141 | 2.389                                     | 2.004 | 1.399 | 0.527 | 1.260                                     | 0.873 | 0.493 | 0.146 |
| Intersection filtering                   | 1.400                                     | 1.011 | 0.500 | 0.110 | 2.311                                     | 1.814 | 1.096 | 0.313 | 1.468                                     | 1.068 | 0.552 | 0.128 |
| BioGranat-IG                             | 1.368                                     | 1.158 | 0.798 | 0.187 | 1.925                                     | 1.800 | 1.475 | 0.613 | 1.376                                     | 1.211 | 0.840 | 0.232 |
| 4-gene disease subnetworks:              |                                           |       |       |       |                                           |       |       |       |                                           |       |       |       |
| HetRank                                  | 1.907                                     | 1.322 | 0.708 | 0.198 | 3.351                                     | 3.000 | 2.277 | 0.895 | 1.971                                     | 1.395 | 0.750 | 0.209 |
| HetRank (pre-network)                    | 1.067                                     | 0.701 | 0.375 | 0.102 | 2.667                                     | 2.034 | 1.256 | 0.418 | 1.130                                     | 0.749 | 0.411 | 0.114 |
| Intersection filtering                   | 1.326                                     | 0.826 | 0.352 | 0.066 | 2.420                                     | 1.692 | 0.896 | 0.206 | 1.424                                     | 0.902 | 0.391 | 0.068 |
| BioGranat-IG                             | 1.678                                     | 1.386 | 0.831 | 0.187 | 2.336                                     | 2.159 | 1.696 | 0.592 | 1.688                                     | 1.436 | 0.898 | 0.213 |
| <b>Unbalanced captured heterogeneity</b> |                                           |       |       |       |                                           |       |       |       |                                           |       |       |       |
| 2-gene disease subnetworks:              |                                           |       |       |       |                                           |       |       |       |                                           |       |       |       |
| HetRank                                  | 1.282                                     | 1.070 | 0.727 | 0.285 | 1.720                                     | 1.619 | 1.421 | 0.789 | 1.301                                     | 1.111 | 0.758 | 0.296 |
| HetRank (pre-network)                    | 1.108                                     | 0.890 | 0.629 | 0.238 | 1.631                                     | 1.459 | 1.181 | 0.639 | 1.137                                     | 0.925 | 0.652 | 0.258 |
| Intersection filtering                   | 0.988                                     | 0.849 | 0.633 | 0.249 | 1.538                                     | 1.354 | 1.072 | 0.520 | 1.002                                     | 0.861 | 0.663 | 0.280 |
| BioGranat-IG                             | 0.810                                     | 0.754 | 0.611 | 0.211 | 1.213                                     | 1.170 | 1.038 | 0.534 | 0.810                                     | 0.754 | 0.623 | 0.235 |
| 3-gene disease subnetworks:              |                                           |       |       |       |                                           |       |       |       |                                           |       |       |       |
| HetRank                                  | 1.643                                     | 1.252 | 0.747 | 0.229 | 2.574                                     | 2.357 | 1.883 | 0.867 | 1.694                                     | 1.310 | 0.786 | 0.243 |
| HetRank (pre-network)                    | 1.120                                     | 0.814 | 0.472 | 0.162 | 2.235                                     | 1.886 | 1.342 | 0.553 | 1.164                                     | 0.858 | 0.512 | 0.174 |
| Intersection filtering                   | 1.230                                     | 0.906 | 0.494 | 0.123 | 2.117                                     | 1.693 | 1.091 | 0.349 | 1.267                                     | 0.961 | 0.533 | 0.139 |

|                             | Average # disease genes ranked in top ten |       |       |       | Average # disease genes ranked in top ten |       |       |       | Average # disease genes ranked in top ten |       |       |       |
|-----------------------------|-------------------------------------------|-------|-------|-------|-------------------------------------------|-------|-------|-------|-------------------------------------------|-------|-------|-------|
|                             | Autosomal Dominant Mode                   |       |       |       | Autosomal Recessive Mode                  |       |       |       | Neutral Mode                              |       |       |       |
|                             | Uncaptured heterogeneity                  |       |       |       | Uncaptured heterogeneity                  |       |       |       | Uncaptured heterogeneity                  |       |       |       |
|                             | 20%                                       | 40%   | 60%   | 80%   | 20%                                       | 40%   | 60%   | 80%   | 20%                                       | 40%   | 60%   | 80%   |
| BioGranat-IG                | 1.277                                     | 1.117 | 0.741 | 0.187 | 1.866                                     | 1.761 | 1.467 | 0.644 | 1.302                                     | 1.130 | 0.794 | 0.217 |
| 4-gene disease subnetworks: |                                           |       |       |       |                                           |       |       |       |                                           |       |       |       |
| HetRank                     | 1.754                                     | 1.264 | 0.698 | 0.203 | 3.152                                     | 2.835 | 2.172 | 0.873 | 1.833                                     | 1.341 | 0.763 | 0.221 |
| HetRank (pre-network)       | 0.983                                     | 0.690 | 0.395 | 0.122 | 2.278                                     | 1.803 | 1.202 | 0.462 | 1.037                                     | 0.742 | 0.419 | 0.134 |
| Intersection filtering      | 1.015                                     | 0.708 | 0.390 | 0.088 | 1.982                                     | 1.487 | 0.923 | 0.293 | 1.073                                     | 0.743 | 0.424 | 0.101 |
| BioGranat-IG                | 1.430                                     | 1.153 | 0.717 | 0.162 | 2.199                                     | 2.035 | 1.556 | 0.602 | 1.462                                     | 1.207 | 0.737 | 0.180 |

All results are based on 1,000 tests.

**Table S5 – Improved ability to recover disease subnetworks under varying levels of genetic heterogeneity using network-informed HetRank approach relative to simple intersection filtering**

|                                    | Avg. increase: # disease genes ranked in top ten |       |       |       | Increase: # tests in which all disease genes rank in top ten |     |     |     |
|------------------------------------|--------------------------------------------------|-------|-------|-------|--------------------------------------------------------------|-----|-----|-----|
|                                    | Uncaptured heterogeneity                         |       |       |       | Uncaptured heterogeneity                                     |     |     |     |
|                                    | 20%                                              | 40%   | 20%   | 40%   | 20%                                                          | 40% | 20% | 40% |
| <b>Autosomal Dominant Mode</b>     |                                                  |       |       |       |                                                              |     |     |     |
| Balanced captured heterogeneity:   |                                                  |       |       |       |                                                              |     |     |     |
| 2-gene disease subnetworks         | 0.126                                            | 0.044 | 0.065 | 0.100 | 108                                                          | 77  | 104 | 55  |
| 3-gene disease subnetworks         | 0.307                                            | 0.277 | 0.240 | 0.110 | 187                                                          | 161 | 74  | 10  |
| 4-gene disease subnetworks         | 0.581                                            | 0.496 | 0.356 | 0.132 | 100                                                          | 52  | 18  | 2   |
| Unbalanced captured heterogeneity: |                                                  |       |       |       |                                                              |     |     |     |
| 2-gene disease subnetworks         | 0.294                                            | 0.221 | 0.094 | 0.036 | 186                                                          | 186 | 117 | 41  |
| 3-gene disease subnetworks         | 0.413                                            | 0.346 | 0.253 | 0.106 | 187                                                          | 141 | 67  | 10  |
| 4-gene disease subnetworks         | 0.739                                            | 0.556 | 0.308 | 0.115 | 83                                                           | 37  | 16  | 2   |
| <b>Autosomal Recessive Mode</b>    |                                                  |       |       |       |                                                              |     |     |     |
| Balanced captured heterogeneity:   |                                                  |       |       |       |                                                              |     |     |     |
| 2-gene disease subnetworks         | 0.063                                            | 0.099 | 0.278 | 0.347 | 61                                                           | 95  | 238 | 187 |
| 3-gene disease subnetworks         | 0.348                                            | 0.602 | 0.826 | 0.561 | 286                                                          | 405 | 324 | 88  |
| 4-gene disease subnetworks         | 0.931                                            | 1.308 | 1.381 | 0.689 | 443                                                          | 353 | 185 | 32  |
| Unbalanced captured heterogeneity: |                                                  |       |       |       |                                                              |     |     |     |
| 2-gene disease subnetworks         | 0.182                                            | 0.265 | 0.349 | 0.269 | 172                                                          | 261 | 321 | 162 |
| 3-gene disease subnetworks         | 0.457                                            | 0.664 | 0.792 | 0.518 | 341                                                          | 403 | 300 | 86  |
| 4-gene disease subnetworks         | 1.170                                            | 1.348 | 1.249 | 0.580 | 381                                                          | 294 | 150 | 24  |
| <b>Neutral Mode</b>                |                                                  |       |       |       |                                                              |     |     |     |
| Balanced captured heterogeneity:   |                                                  |       |       |       |                                                              |     |     |     |
| 2-gene disease subnetworks         | 0.163                                            | 0.063 | 0.051 | 0.084 | 131                                                          | 81  | 97  | 50  |
| 3-gene disease subnetworks         | 0.309                                            | 0.285 | 0.233 | 0.110 | 202                                                          | 169 | 82  | 12  |
| 4-gene disease subnetworks         | 0.547                                            | 0.493 | 0.359 | 0.141 | 108                                                          | 59  | 22  | 2   |
| Unbalanced captured heterogeneity: |                                                  |       |       |       |                                                              |     |     |     |
| 2-gene disease subnetworks         | 0.299                                            | 0.250 | 0.095 | 0.016 | 187                                                          | 194 | 110 | 42  |
| 3-gene disease subnetworks         | 0.427                                            | 0.349 | 0.253 | 0.104 | 198                                                          | 157 | 73  | 11  |
| 4-gene disease subnetworks         | 0.760                                            | 0.598 | 0.339 | 0.120 | 95                                                           | 43  | 16  | 1   |

All results are based on 1,000 tests.



**Table S6 – Summary of top prioritised genes in 13 Adams-Oliver syndrome exomes****(a) Top prioritised genes using PINA network**

| Position | Gene                 | Evidence for disease involvement                                                                                                                                                                                                            |
|----------|----------------------|---------------------------------------------------------------------------------------------------------------------------------------------------------------------------------------------------------------------------------------------|
| 1        | <i>XRCC6</i>         | Novel truncating or splicing variants in direct neighbours <i>NOTCH1</i> (2 exomes), <i>XRCC5</i> , <i>ILVBL</i> and <i>HERPUD1</i> (1 exome each)                                                                                          |
| 2        | <i>GSK3B</i>         | Novel truncating or splicing variants in direct neighbours <i>FAM83D</i> , <i>GNB2</i> , <i>KIF5B</i> , <i>NOTCH1</i> and <i>UBXN6</i> (1 exome each)                                                                                       |
| 3        | <i>MAPK6</i>         | Novel truncating or splicing variant in 1 exome (and no control exomes); novel altering variant in 1 exome (and 1 control exome); novel truncating or splicing variants in direct neighbours <i>NDUFS6</i> and <i>NEURL4</i> (1 exome each) |
| 4        | <i>PLK1</i>          | Novel truncating or splicing variants in direct neighbours <i>CTBP1</i> , <i>MAPK6</i> and <i>NINL</i> (1 exome each); novel altering variants in direct neighbours <i>ACTL6B</i> and <i>CHEK2</i> (1 exome each)                           |
| 5        | <i>PHYH</i>          | Novel truncating or splicing variants in direct neighbours <i>NOTCH1</i> (2 exomes), <i>CRIM1</i> and <i>GNB2</i> (1 exome each); novel synonymous variant in direct neighbour <i>MOAP1</i> (1 exome)                                       |
| 6        | <i>NINL</i>          | Novel truncating or splicing variants in 2 exomes (and no control exomes); novel truncating or splicing variant in direct neighbour <i>EZH2</i> (1 exome)                                                                                   |
| 7        | <i>VPS54</i>         | Novel truncating or splicing variant in 1 exome (and no control exomes); rare truncating or splicing variant in 1 exome (and no control exomes); novel truncating or splicing variant in indirect neighbour <i>UBE2Z</i> (1 exome)          |
| 8        | <i>TFAP4</i>         | Novel truncating or splicing variants in direct neighbours <i>CTBP1</i> , <i>UBP1</i> and <i>USF2</i> (1 exome each); novel altering variant in direct neighbours <i>HMGB3</i> and <i>THYN1</i> (1 exome each)                              |
| 9        | <i>TPSB2</i>         | Novel truncating or splicing variants in 2 exomes (and no control exomes)                                                                                                                                                                   |
| 10       | <i>MCM10</i>         | Novel truncating or splicing variants in direct neighbours <i>NINL</i> (2 exomes) and <i>CUL4A</i> (1 exome); rare truncating or splicing variant in direct neighbour <i>CDKN1A</i> (1 exome)                                               |
| 12       | <b><i>NOTCH1</i></b> | Novel truncating or splicing variants in 2 exomes (and no control exomes)                                                                                                                                                                   |
| =187     | <b><i>DLL4</i></b>   | Novel missense variant in 1 exome (and 1 control exome); novel truncating or splicing variants in direct neighbour <i>NOTCH1</i> (2 exomes)                                                                                                 |

**(b) Top prioritised genes using PINAmin2 network**

| Position | Gene                 | Evidence for disease involvement                                                                                                                                                            |
|----------|----------------------|---------------------------------------------------------------------------------------------------------------------------------------------------------------------------------------------|
| 1        | <i>TPSB2</i>         | Novel truncating or splicing variants in 2 exomes (and no control exomes)                                                                                                                   |
| 2        | <i>NINL</i>          | Novel truncating or splicing variants in 2 exomes (and no control exomes)                                                                                                                   |
| 3        | <b><i>NOTCH1</i></b> | Novel truncating or splicing variants in 2 exomes (and no control exomes)                                                                                                                   |
| 4        | <i>DCUN1D5</i>       | Novel truncating or splicing variants in 2 exomes (and no control exomes)                                                                                                                   |
| 5        | <i>GNB2</i>          | Novel truncating or splicing variant in 1 exome (and no control exomes); rare truncating or splicing variants in 2 exomes (one of which has its score bettered in 1 control exome)          |
| 6        | <i>PPEF2</i>         | Novel truncating or splicing variant in 1 exome (and no control exomes); rare truncating or splicing variant in 1 exome (and no control exomes)                                             |
| 7        | <i>EP300</i>         | Novel truncating or splicing variants in direct neighbours <i>CTBP1</i> , <i>ETS2</i> and <i>NOTCH1</i> (1 exome each); novel synonymous variant in direct neighbour <i>STAT1</i> (1 exome) |
| 8        | <i>LRIT1</i>         | Novel truncating or splicing variant in 1 exome (and no control exomes); rare truncating or splicing variant in 1 exome (and no control exomes)                                             |

| Position | Gene               | Evidence for disease involvement                                                                                                                |
|----------|--------------------|-------------------------------------------------------------------------------------------------------------------------------------------------|
| 9        | <i>VPS54</i>       | Novel truncating or splicing variant in 1 exome (and no control exomes); rare truncating or splicing variant in 1 exome (and no control exomes) |
| 10       | <i>RPE</i>         | Novel truncating or splicing variant in 1 exome (and no control exomes); novel synonymous variant in 1 exome (and no control exomes)            |
| 1047     | <b><i>DLL4</i></b> | Novel missense variant in 1 exome (and 1 control exome)                                                                                         |

**Table S7 – Ability to prioritise Adams-Oliver syndrome genes with additional disease-causing variants**

| <b>Variants added</b>                        | <b><i>NOTCH1</i> rank</b> | <b><i>DLL4</i> rank</b> |
|----------------------------------------------|---------------------------|-------------------------|
| No added variants                            | 12                        | =187                    |
| <i>DLL4</i> variant in 1 additional exome    | 12                        | 35                      |
| <i>DLL4</i> variant in 2 additional exomes   | 13                        | 7                       |
| <i>NOTCH1</i> variant in 1 additional exome  | 1                         | 47                      |
| <i>NOTCH1</i> variant in 2 additional exomes | 1                         | 24                      |
| <i>NOTCH1</i> variant in 3 additional exomes | 1                         | 20                      |
| <i>NOTCH1</i> variant in 4 additional exomes | 1                         | 20                      |
